# Supplementary material for: Me-LLaMA: Medical Foundation Large Language Models for Comprehensive Text Analysis and Beyond
Source: PubMed Central journal article supplement (PMC11702801; doi:10.21203/rs.3.rs-5456223/v1), 2024-12-18
Supplement: NIHPPRS5456223v1-supplement-1.pdf [file NIHPPRS5456223v1-supplement-1.pdf]

## Supplementary Files

This is a list of supplementary files associated with this preprint. Click to download.

- [APPENDIX.docx](#)
